# Supplementary material
Source: HighWire-hosted journal article supplement (https://jitc.bmj.com/content/9/6/e002434)

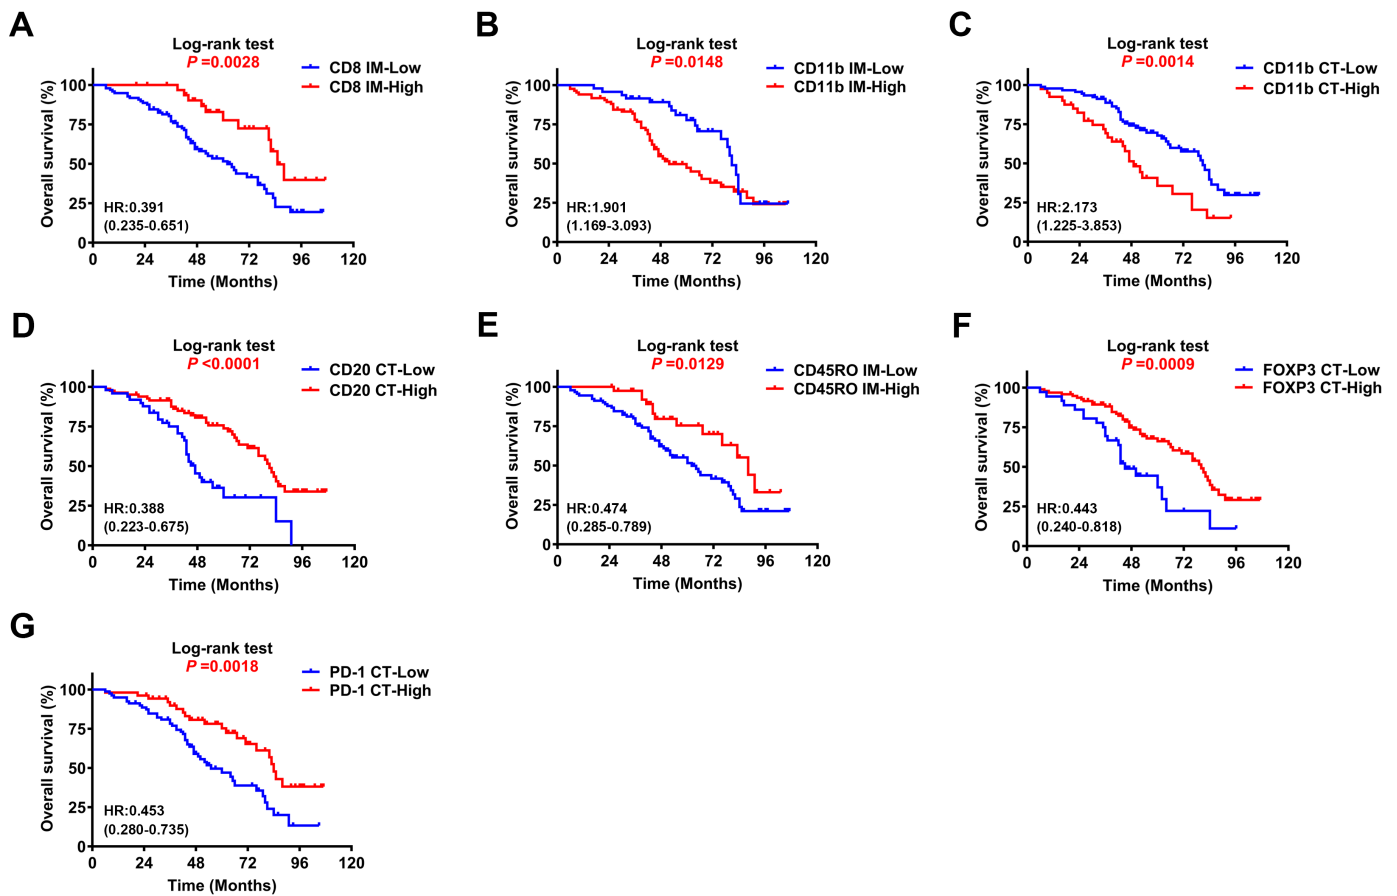

Supplement: inline-supplementary-material-12 [file inline-supplementary-material-12.pdf]

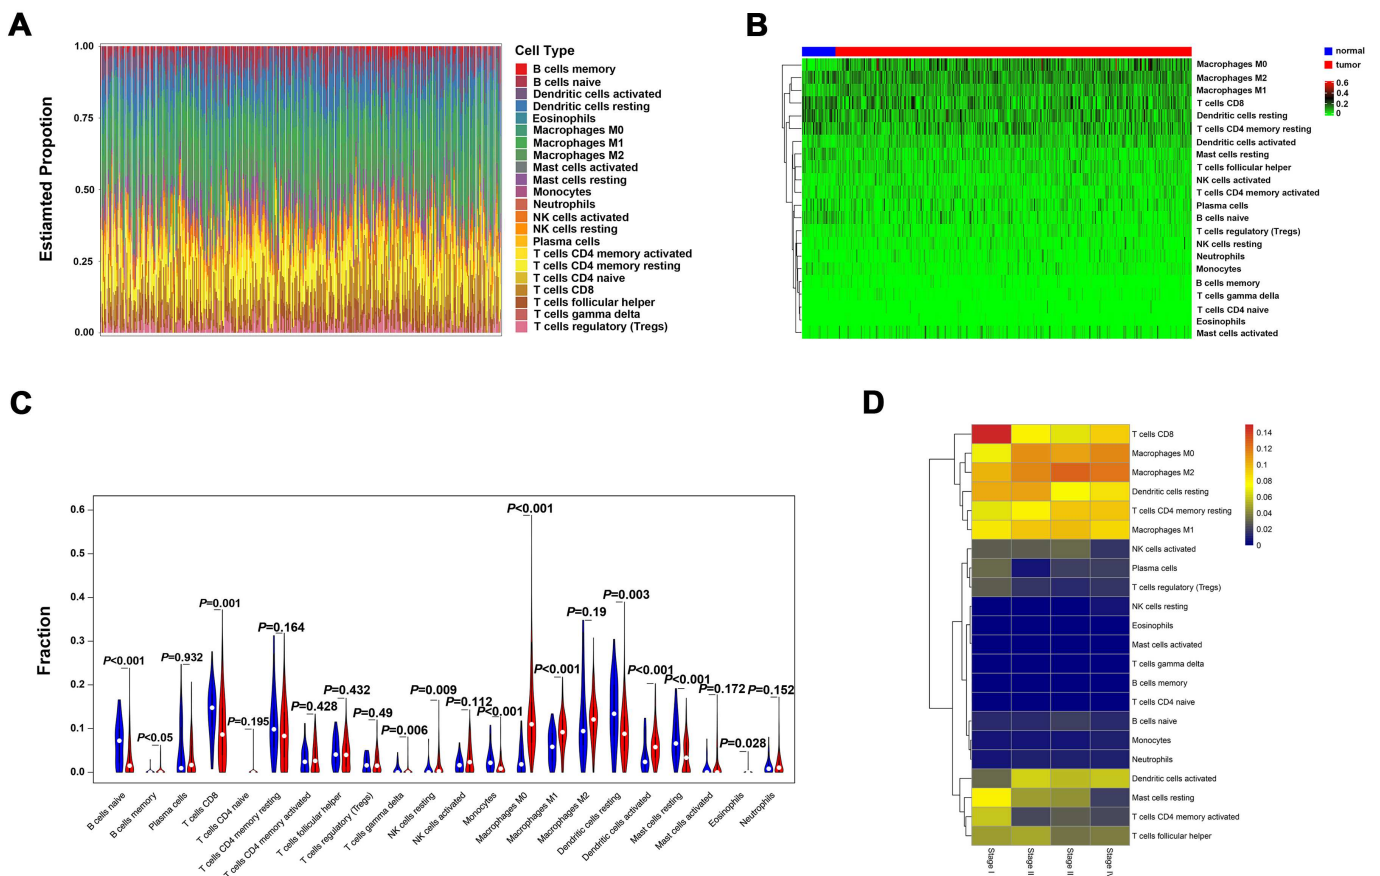

Supplement: inline-supplementary-material-22 [file inline-supplementary-material-22.pdf]

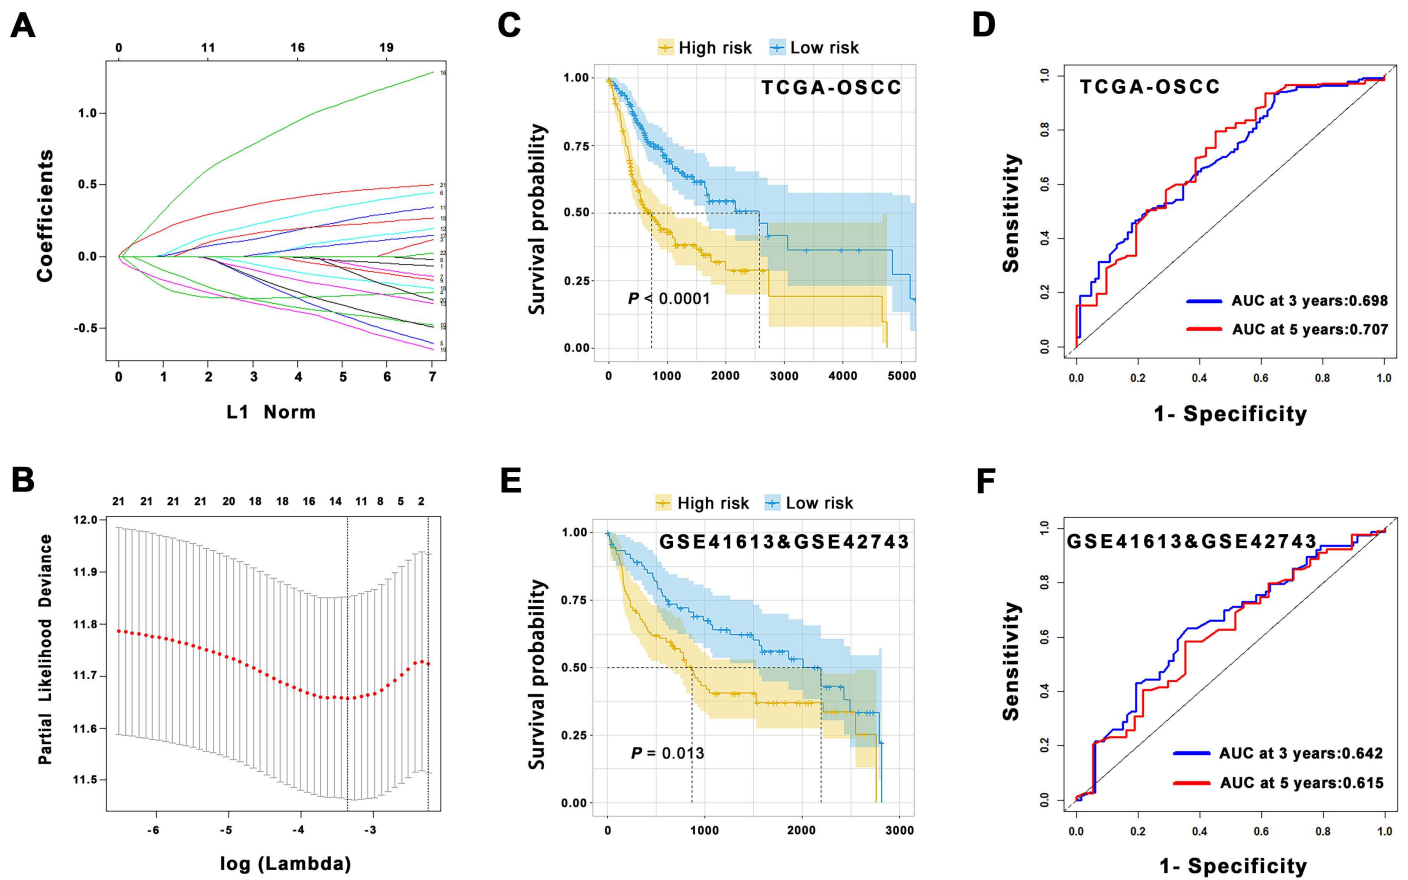

Supplement: inline-supplementary-material-23 [file inline-supplementary-material-23.pdf]

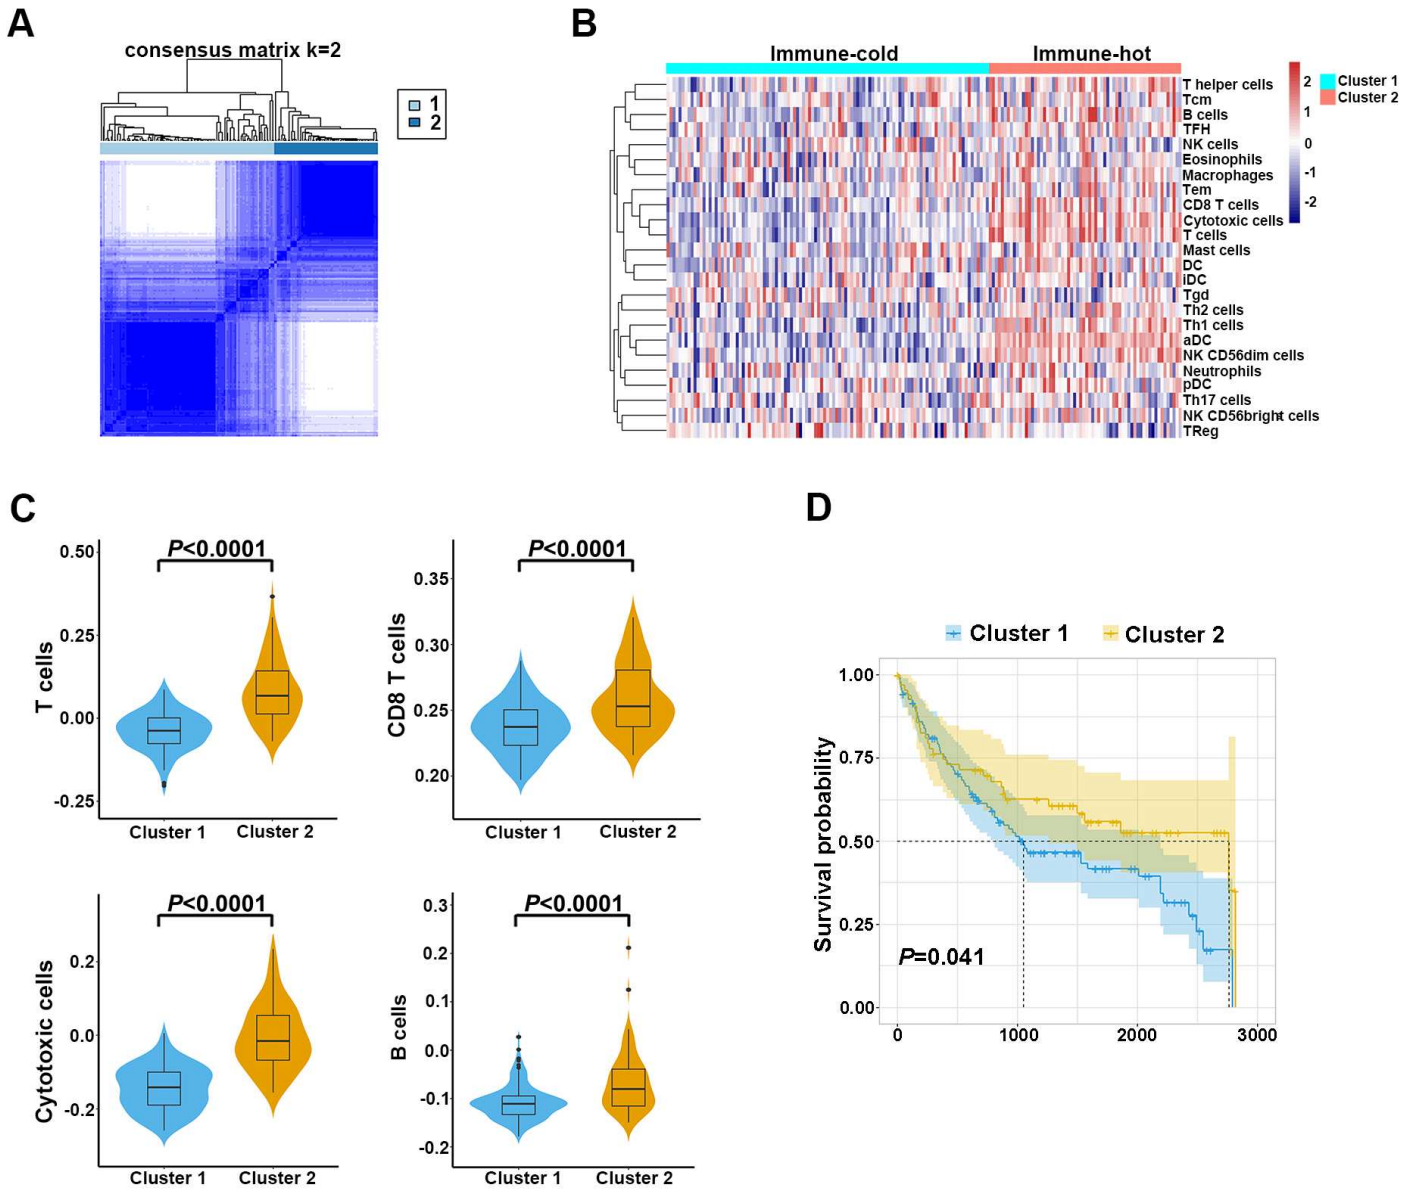

Supplement: inline-supplementary-material-25 [file inline-supplementary-material-25.pdf]

**A**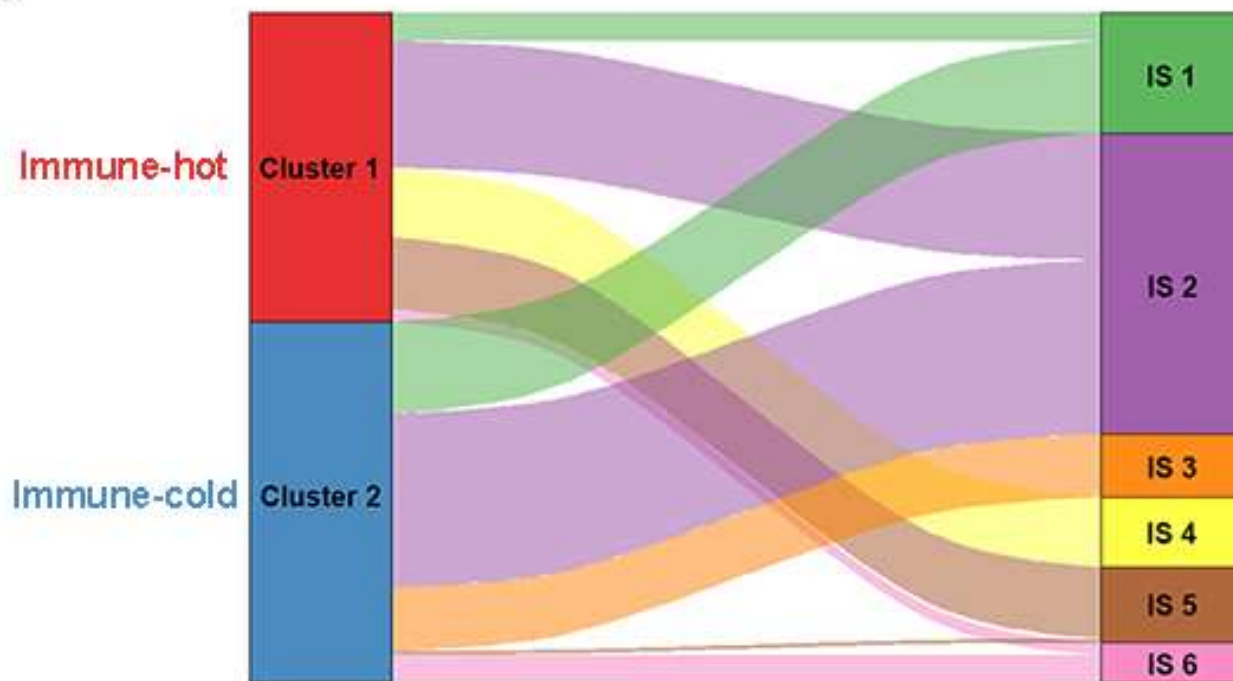**B**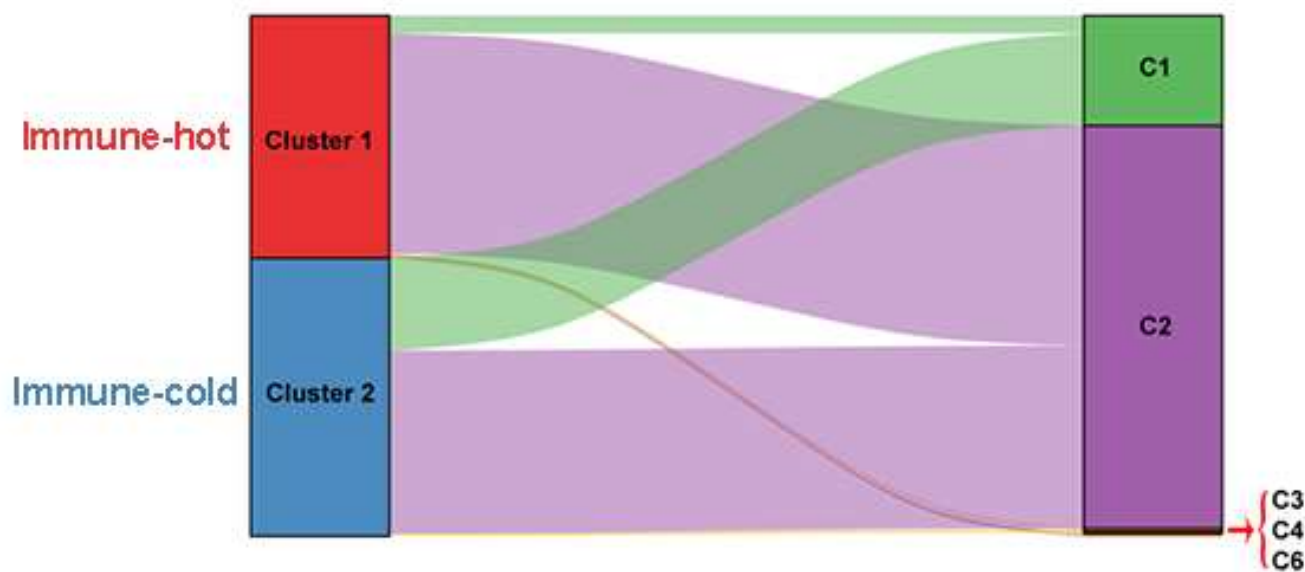

Supplement: inline-supplementary-material-27 [file inline-supplementary-material-27.pdf]

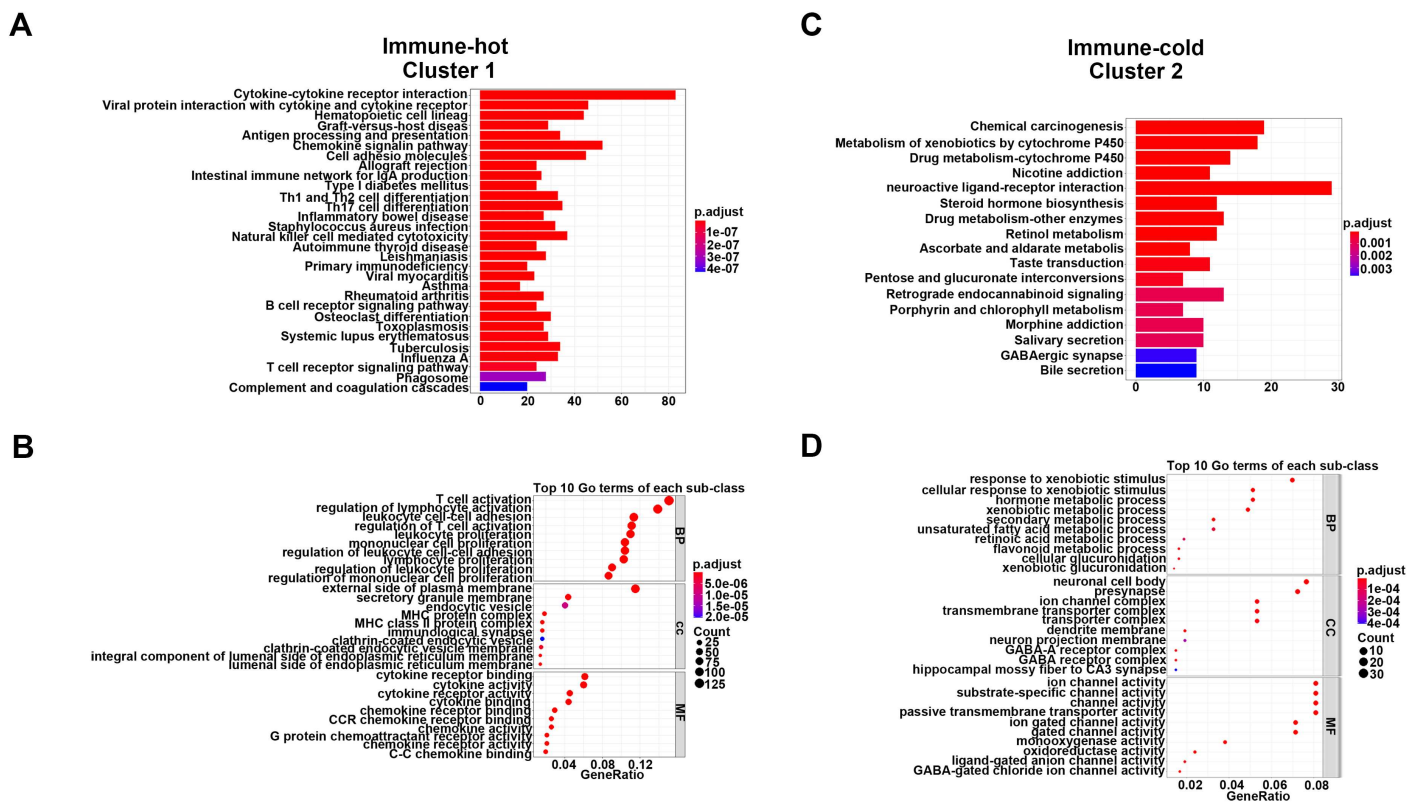

Supplement: inline-supplementary-material-28 [file inline-supplementary-material-28.pdf]

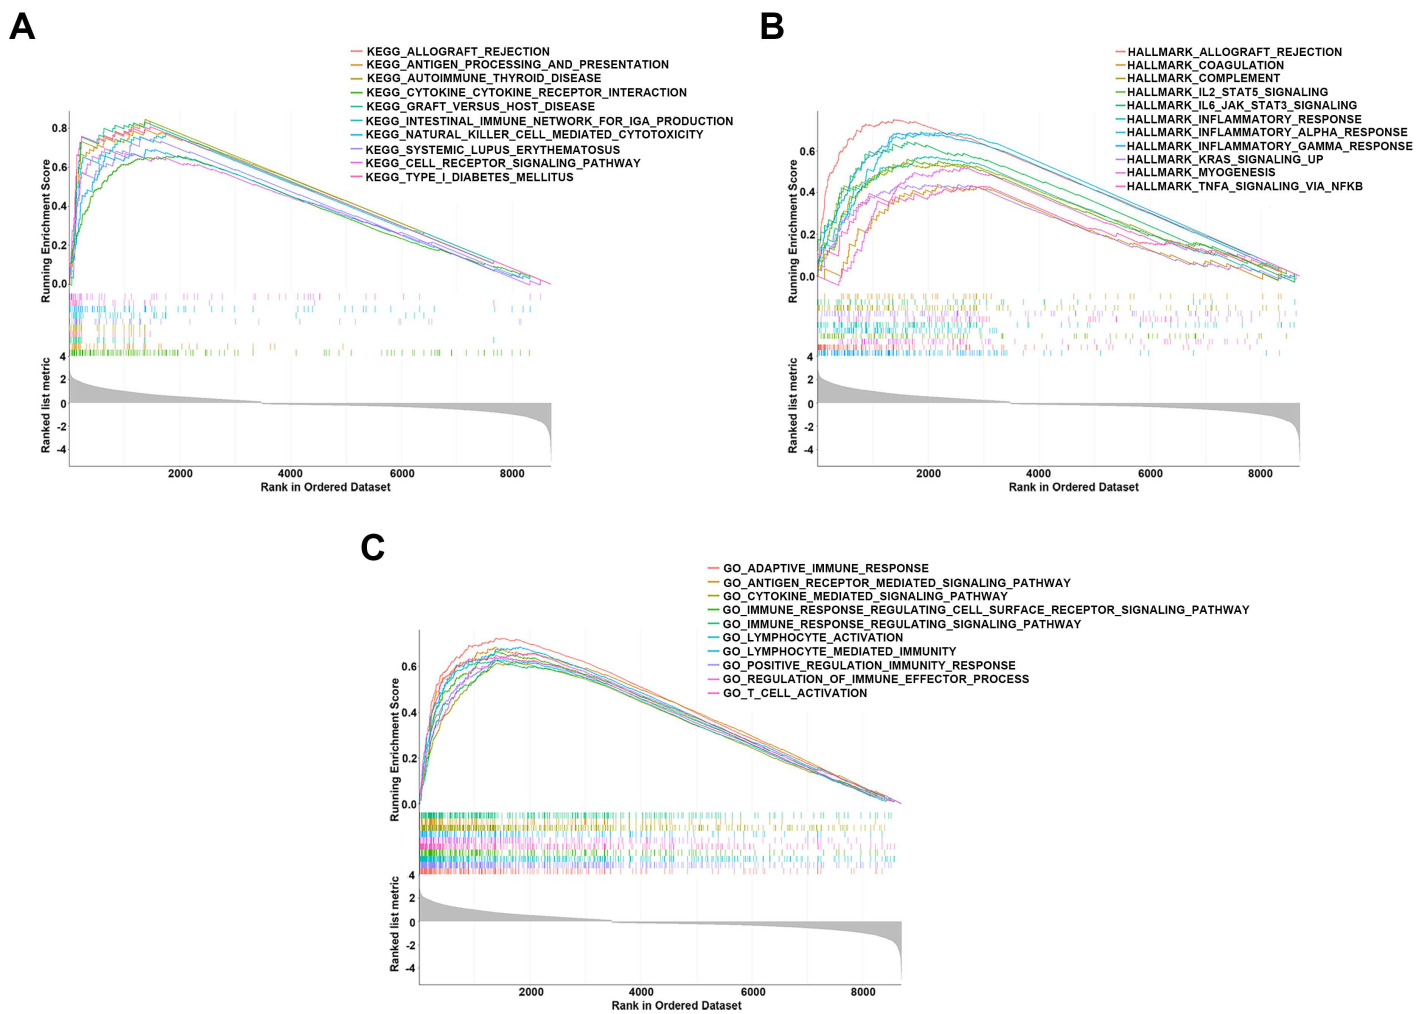

Supplement: inline-supplementary-material-29 [file inline-supplementary-material-29.pdf]

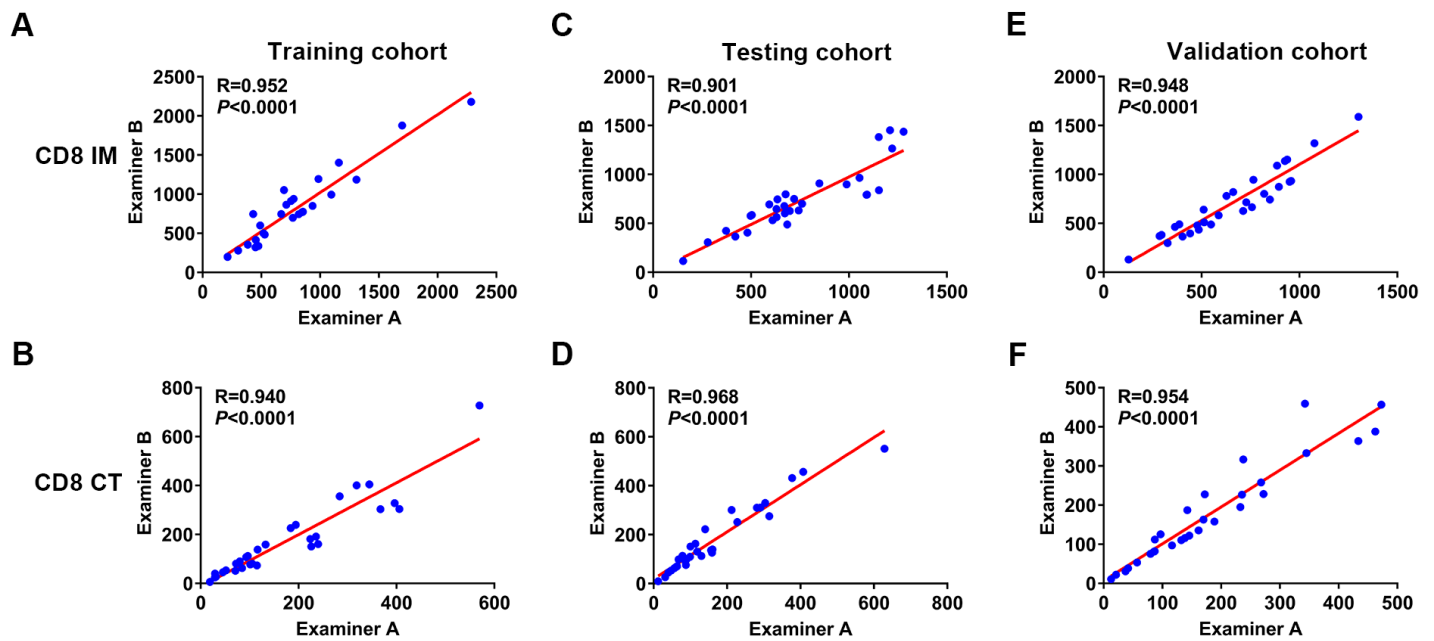

Supplement: inline-supplementary-material-3 [file inline-supplementary-material-3.pdf]

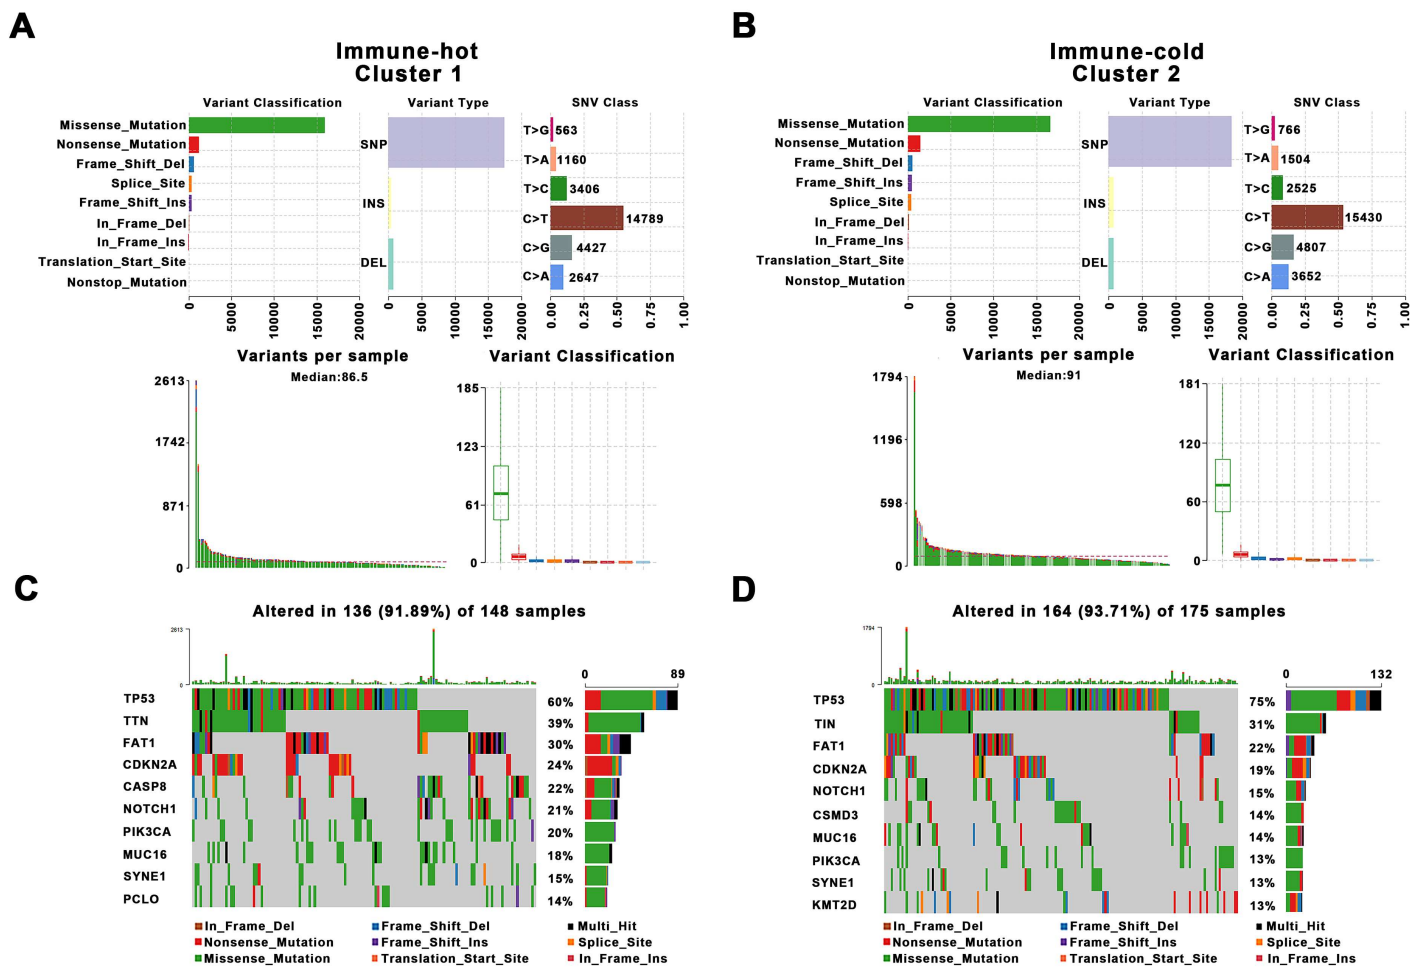

Supplement: inline-supplementary-material-31 [file inline-supplementary-material-31.pdf]

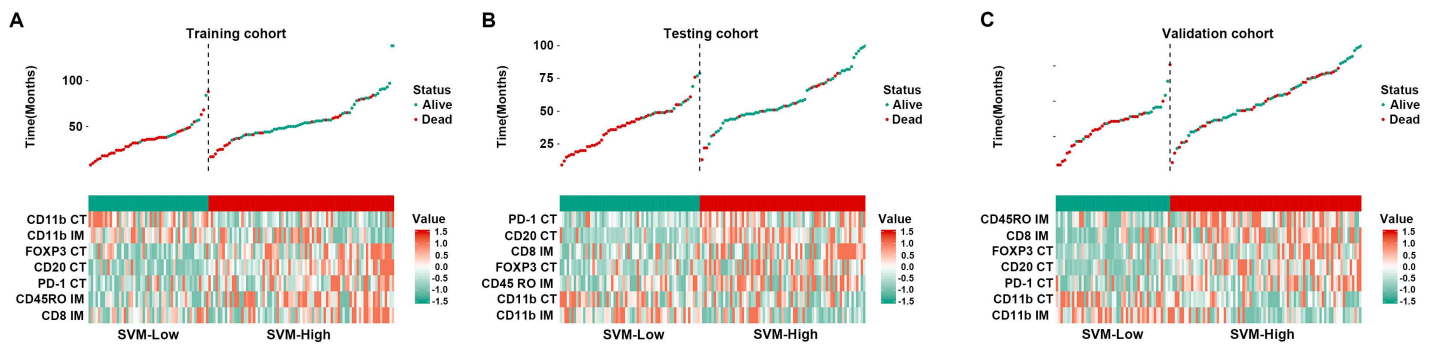

Supplement: inline-supplementary-material-7 [file inline-supplementary-material-7.pdf]

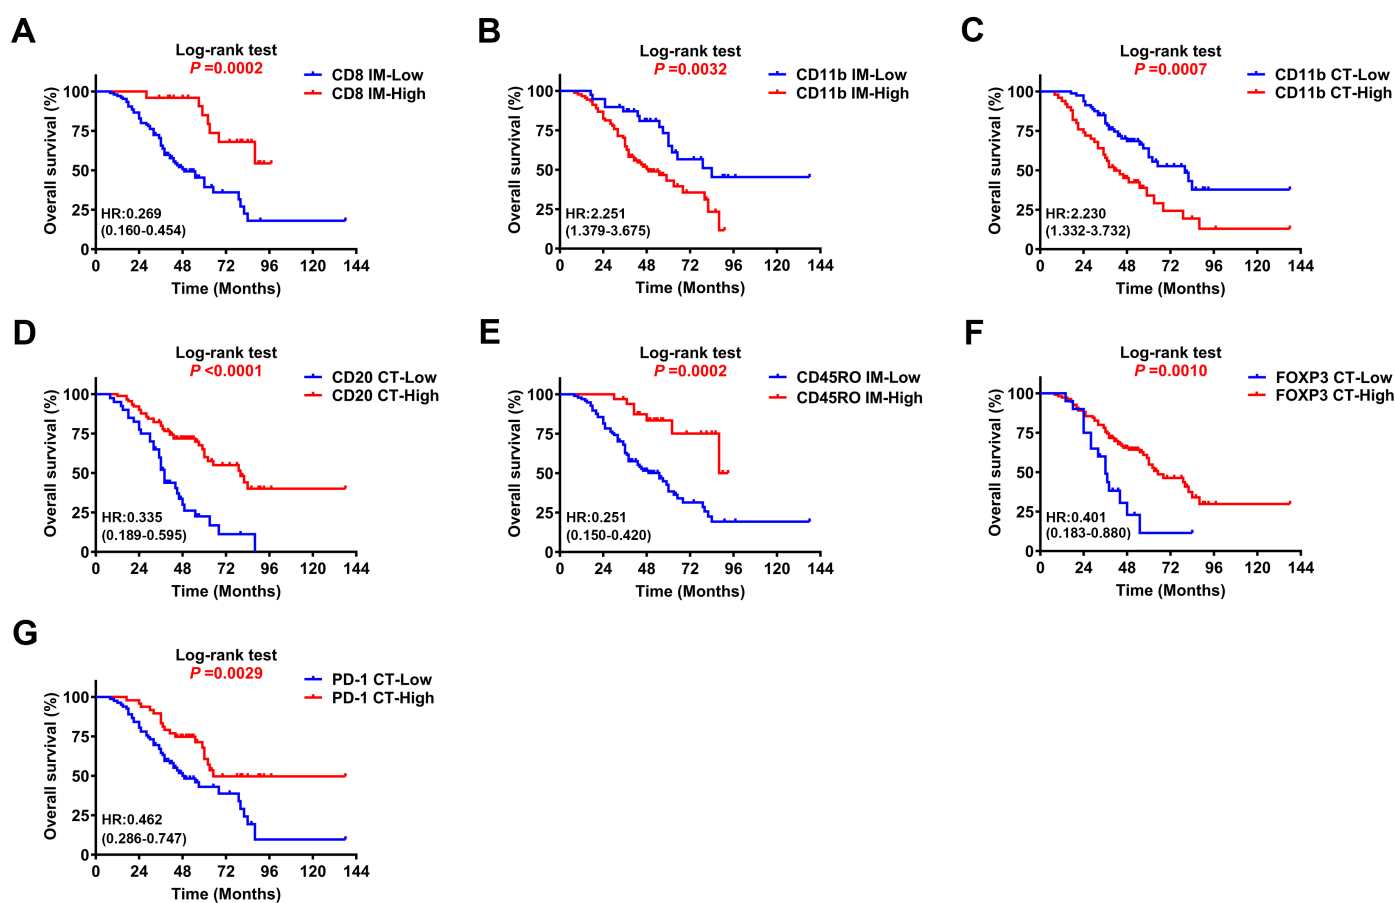

Supplement: inline-supplementary-material-8 [file inline-supplementary-material-8.pdf]

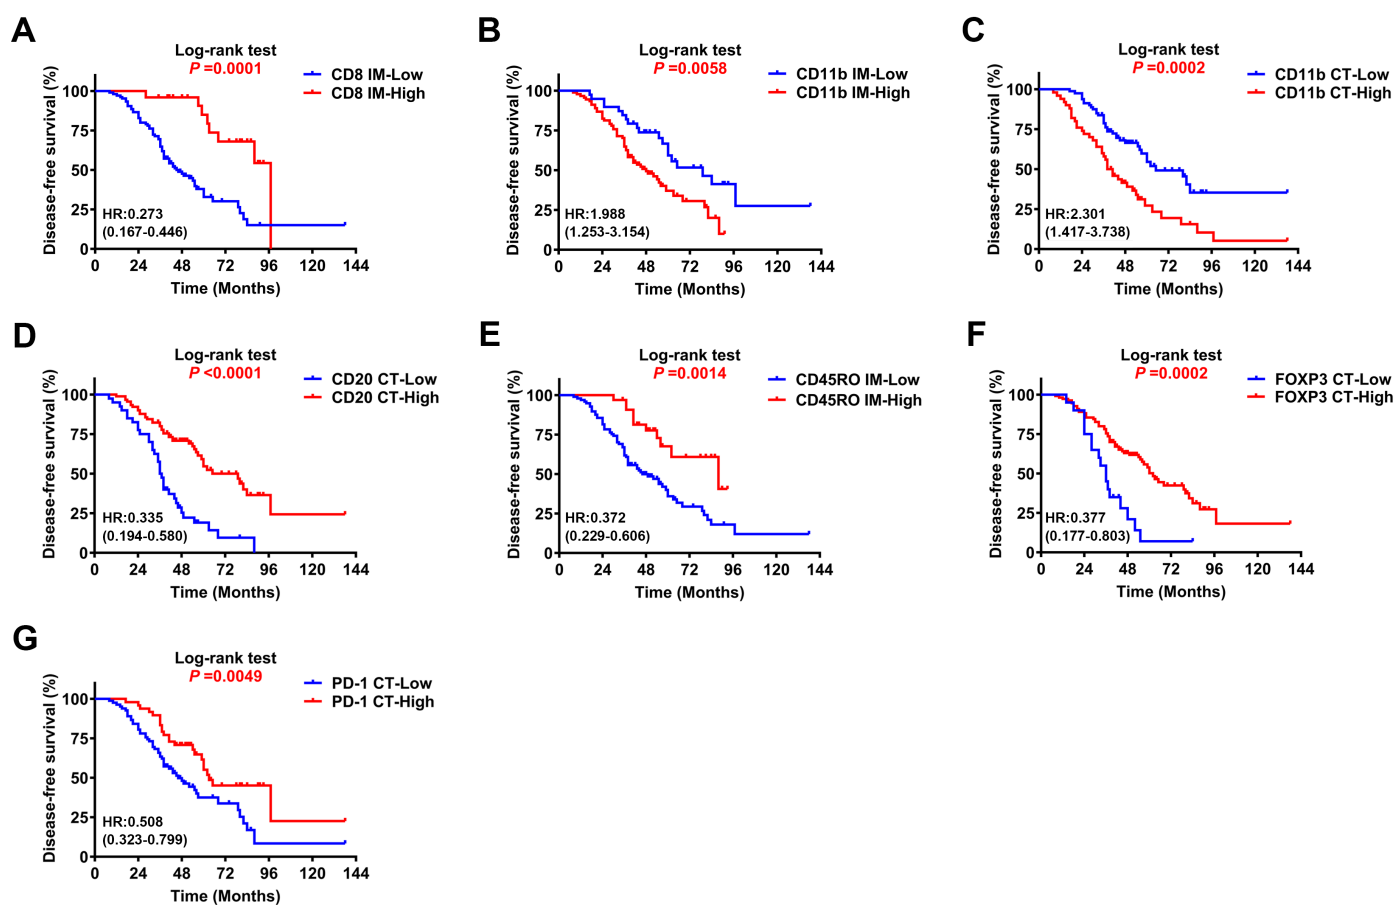

Supplement: inline-supplementary-material-9 [file inline-supplementary-material-9.pdf]
